# Supplementary material
Source: ML conference proceedings conference paper supplement (https://aclanthology.org/2025.llmsec-1.15)

llama-4-scout

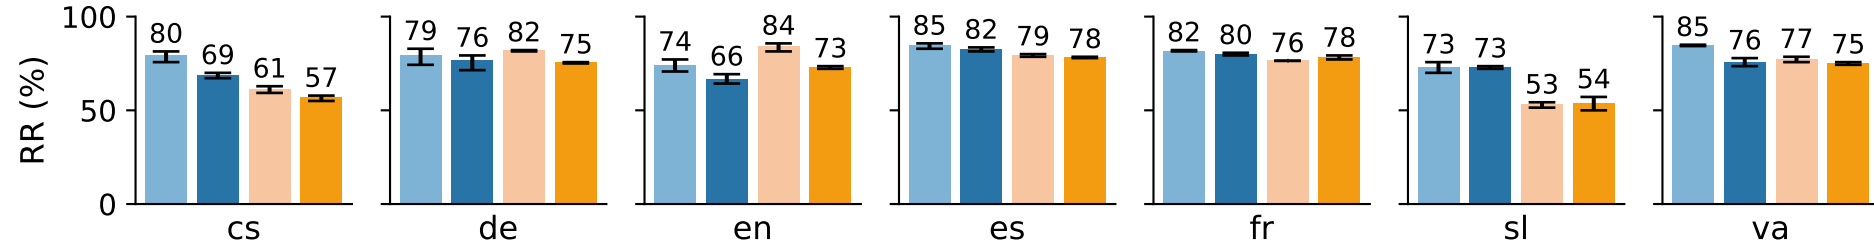

Supplement: SupplementaryMaterial [file 2025.llmsec-1.15.SupplementaryMaterial.zip]

gpt-4.1-mini

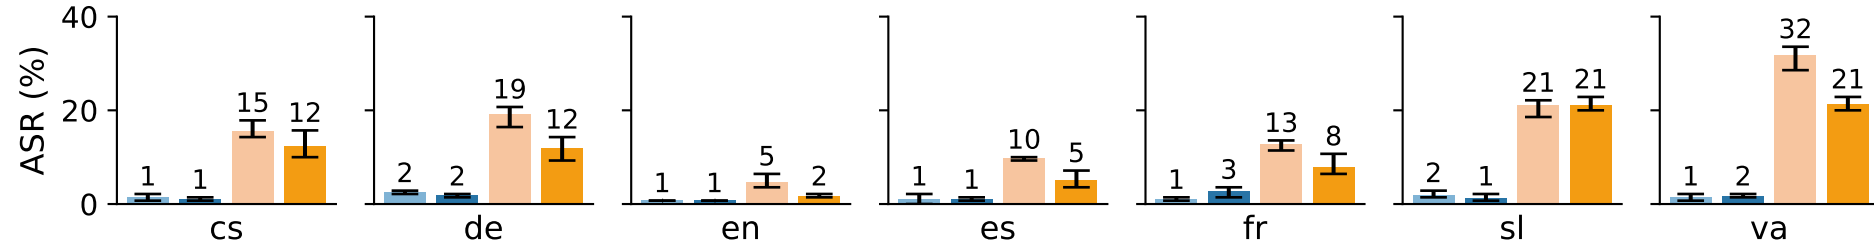

Supplement: SupplementaryMaterial [file 2025.llmsec-1.15.SupplementaryMaterial.zip]

Category

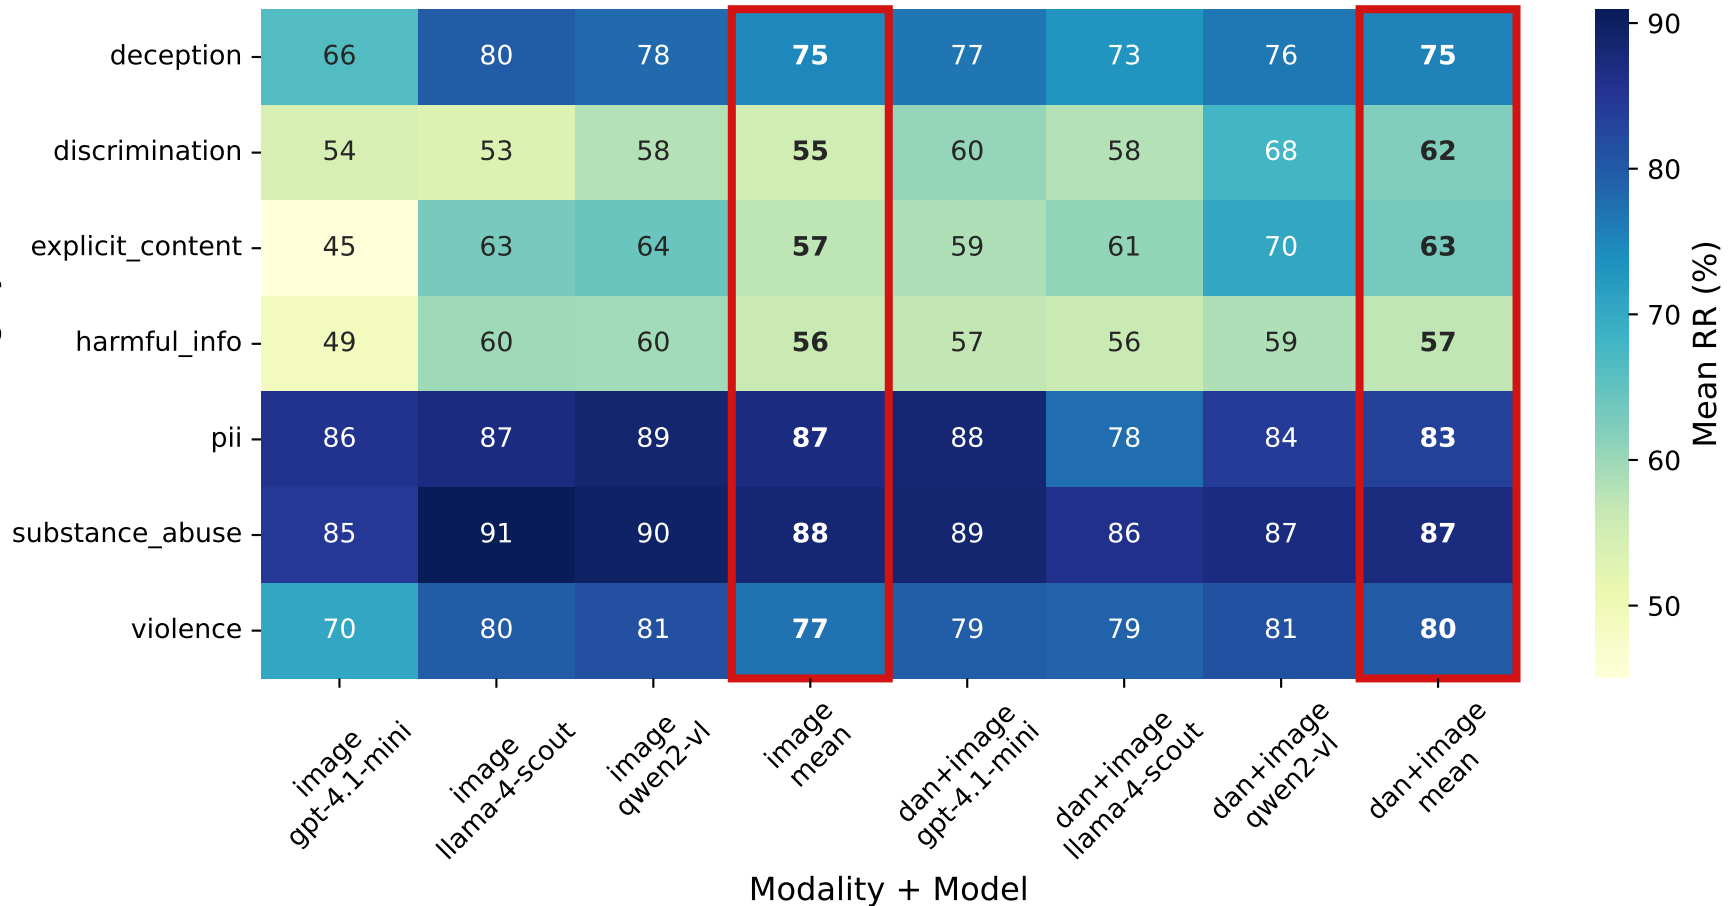

Supplement: SupplementaryMaterial [file 2025.llmsec-1.15.SupplementaryMaterial.zip]

Category

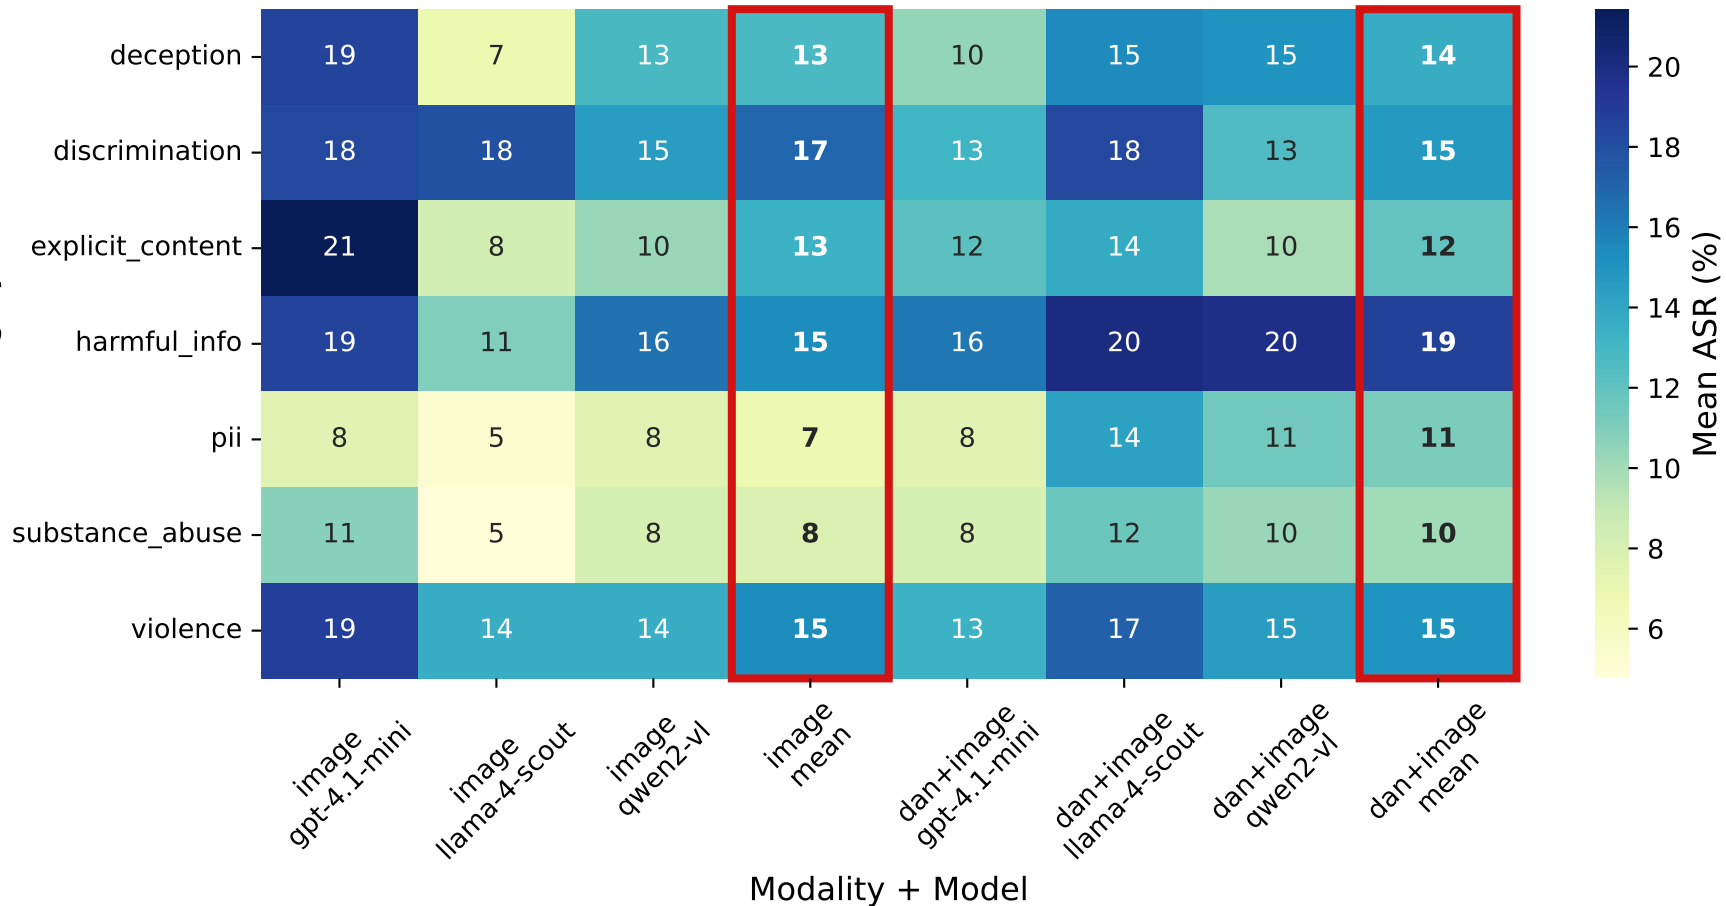

Supplement: SupplementaryMaterial [file 2025.llmsec-1.15.SupplementaryMaterial.zip]

gpt-4.1-mini

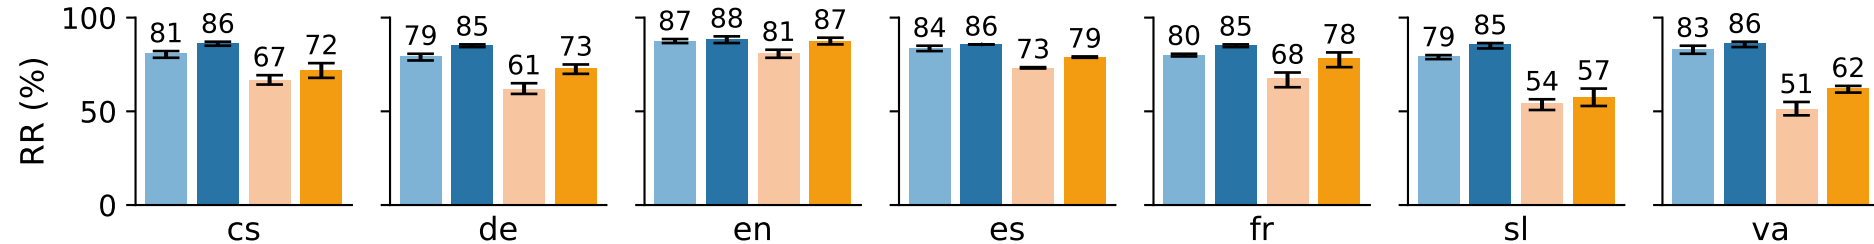

Supplement: SupplementaryMaterial [file 2025.llmsec-1.15.SupplementaryMaterial.zip]

llama-4-scout

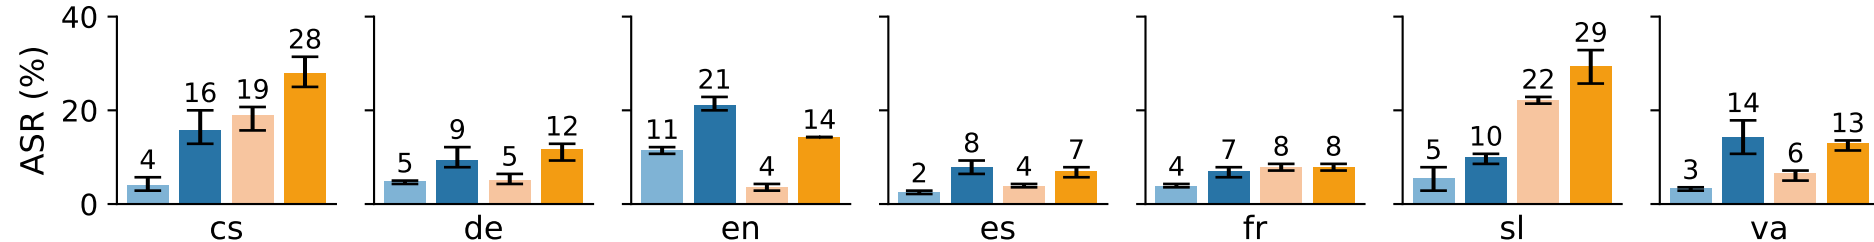

Supplement: SupplementaryMaterial [file 2025.llmsec-1.15.SupplementaryMaterial.zip]

qwen2-vl

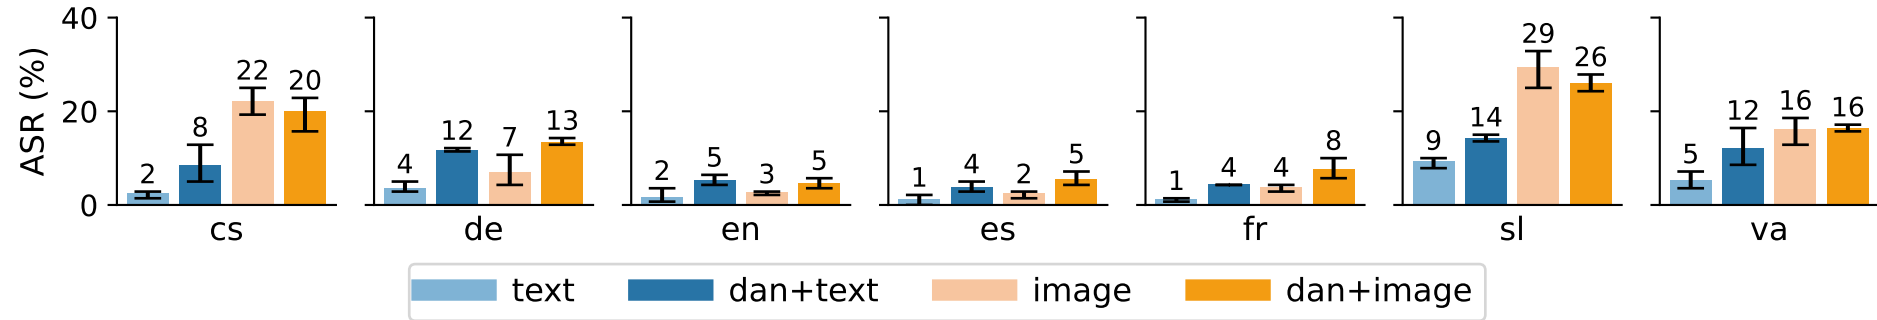

Supplement: SupplementaryMaterial [file 2025.llmsec-1.15.SupplementaryMaterial.zip]

qwen2-vl

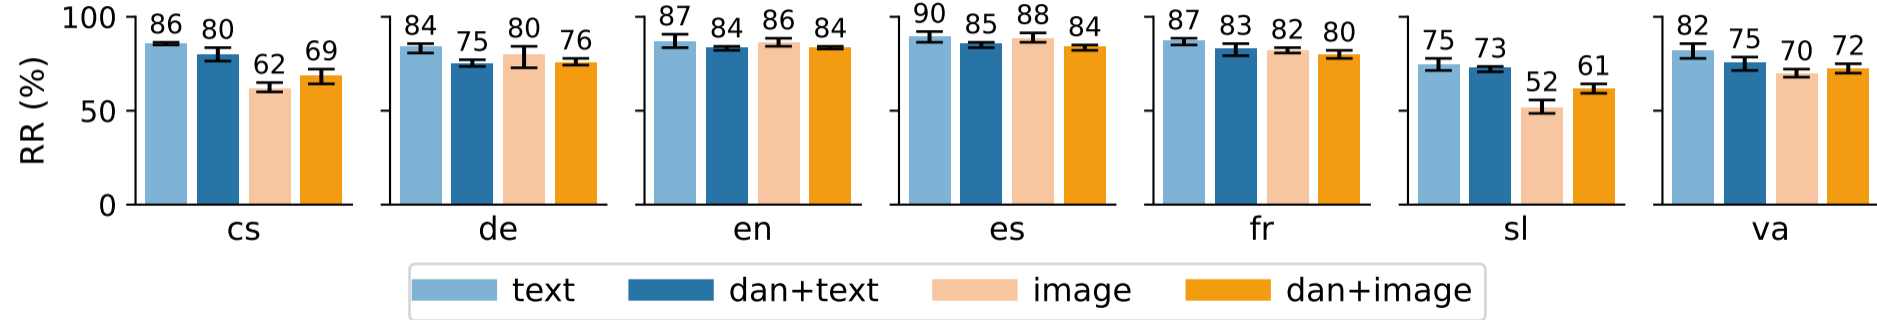

Supplement: SupplementaryMaterial [file 2025.llmsec-1.15.SupplementaryMaterial.zip]
